# Supplementary material
Source: ML conference proceedings conference paper supplement (https://proceedings.neurips.cc/paper_files/paper/2018/hash/322f62469c5e3c7dc3e58f5a4d1ea399-Abstract.html)
Supplement: Supplementary file [file 322f62469c5e3c7dc3e58f5a4d1ea399-Supplemental.zip]

---

# Supplementary Material: Unorganized Malicious Attacks Detection

---

**Ming Pang   Wei Gao   Min Tao   Zhi-Hua Zhou**  
 National Key Laboratory for Novel Software Technology,  
 Nanjing University, Nanjing, 210023, China  
 {pangm, gaow, zhouzh}@lamda.nju.edu.cn   taom@nju.edu.cn

## 1 Optimization Model of UMA

We consider the following optimization model:

$$\begin{aligned} \min \quad & \|X\|_* + \tau\|Y\|_1 - \alpha\langle \bar{M}, Y \rangle + \frac{\kappa}{2}\|Y\|_F^2, \\ \text{s.t.} \quad & X + Y + Z = \bar{M}, \\ & Z \in \mathbf{B}, \\ & \mathbf{B} := \{Z \mid \|P_\Omega(Z)\|_F \leq \delta\}, \end{aligned} \tag{1.1}$$

where  $\kappa > 0$  is a regularization parameter and  $\bar{M} := P_\Omega(M)$ . The model (1.1) is a three-block convex programming. We define the Lagrangian function and augmented Lagrangian function of (1.1) as follows:

$$\mathcal{L}(X, Y, Z, \Lambda) := \|X\|_* + \tau\|Y\|_1 - \alpha\langle \bar{M}, Y \rangle + \frac{\kappa}{2}\|Y\|_F^2 - \langle \Lambda, X + Y + Z - \bar{M} \rangle, \tag{1.2}$$

$$\begin{aligned} \mathcal{L}_\mathcal{A}(X, Y, Z, \Lambda, \beta) := & \|X\|_* + \tau\|Y\|_1 - \alpha\langle \bar{M}, Y \rangle + \frac{\kappa}{2}\|Y\|_F^2 - \langle \Lambda, X + Y + Z - \bar{M} \rangle \\ & + \frac{\beta}{2}\|X + Y + Z - \bar{M}\|_F^2, \end{aligned} \tag{1.3}$$

where  $\beta > 0$  is the penalty parameter.

## 2 Recovery Guarantee

In this section, we present theoretical guarantee that UMA can recover the low-rank component  $X_0$  and the sparse component  $Y_0$ . For simplicity, our theoretical analysis focuses on square matrix, and it is natural to generalize our results to the general rectangular matrices.

Let the singular value decomposition of  $X_0 \in \mathcal{R}^{n \times n}$  be given by

$$X_0 = S \Sigma D^\top = \sum_{i=1}^r \sigma_i s_i d_i^\top \tag{2.4}$$

where  $r$  is the rank of matrix  $X_0$ ,  $\sigma_1, \dots, \sigma_r$  are the positive singular values, and  $S = [s_1, \dots, s_r]$  and  $D = [d_1, \dots, d_r]$  are the left- and right-singular matrices, respectively. For  $\mu > 0$ , we assume

$$\begin{aligned} \max_i \|S^\top e_i\|^2 & \leq \mu r/n, \\ \max_i \|D^\top e_i\|^2 & \leq \mu r/n, \\ \|SD^\top\|_\infty^2 & \leq \mu r/n^2. \end{aligned} \tag{2.5}$$

Firstly, we consider the following optimization problem where all the entries of  $M$  can be observed.

$$\begin{aligned} \min_{X, Y, Z} \quad & \|X\|_* + \tau\|Y\|_1 - \alpha\langle M, Y \rangle + \frac{\kappa}{2}\|Y\|_F^2 \\ \text{s.t.} \quad & X + Y + Z = M, \\ & \|Z\|_F \leq \delta. \end{aligned} \tag{2.6}$$

**Theorem 2.1** Suppose that the support set of  $Y_0$  be uniformly distributed for all sets of cardinality  $k$ , and  $X_0$  satisfies the incoherence condition given by Eqn. (2.5). Let  $X$  and  $Y$  be the solution of optimization problem given by Eqn. (2.6) with parameter  $\tau = O(1/\sqrt{n})$ ,  $\kappa = O(1/\sqrt{n})$  and  $\alpha = O(1/n)$ . For some constant  $c > 0$  and sufficiently large  $n$ , the following holds with probability at least  $1 - cn^{-10}$  over the choice on the support of  $Y_0$

$$\|X_0 - X\|_F \leq \delta \text{ and } \|Y_0 - Y\|_F \leq \delta \quad (2.7)$$

if  $\text{rank}(X_0) \leq \rho_r n / \mu / \log^2 n$  and  $k \leq \rho_s n^2$ , where  $\rho_r$  and  $\rho_s$  are positive constant.

*Proof:*

Let  $\Omega$  be the space of matrices with the same support as  $Y_0$ , and let  $T$  denote the linear space of matrices

$$T := \{SA^\top + BD^\top, A, B \in \mathbb{R}^{n \times r}\}. \quad (2.8)$$

We will first prove that, for  $\|P_\Omega P_T\| \leq 1/2$ ,  $(X_0, Y_0)$  is the unique solution if there is a pair  $(W, F)$  satisfying

$$SD^\top + W = \tau(\text{sgn}(Y_0) + F + P_\Omega K) \quad (2.9)$$

where  $P_T W = 0$  and  $\|W\| \leq 1/2$ ,  $P_\Omega F = 0$  and  $\|F\|_\infty \leq 1/2$  and  $\|P_\Omega K\|_F \leq 1/4$ . Notice that  $SD^\top + W_0$  is an arbitrary subgradient of  $\|X\|_*$  at  $(X_0, Y_0)$ , and  $\tau(\text{sgn}(Y_0) + F_0) - \alpha M + \kappa Y_0$  is an arbitrary subgradient of  $\tau\|Y\|_1 - \alpha\langle M, Y \rangle + \kappa\|Y\|_F^2/2$  at  $(X_0, Y_0)$ . For any matrix  $H$ , we have, by the definition of subgradient,

$$\begin{aligned} & \|X_0 + H\|_* + \tau\|Y_0 - H\|_1 - \alpha\langle M, Y_0 - H \rangle + \frac{\kappa}{2}\|Y_0 - H\|_F^2 \\ & \geq \|X_0\|_* + \tau\|Y_0\|_1 - \alpha\langle M, Y_0 \rangle + \frac{\kappa}{2}\|Y_0\|_F^2 + \langle \alpha M - \kappa Y_0, H \rangle \\ & \quad + \langle SD^\top + W_0, H \rangle - \tau\langle \text{sgn}(Y_0) + F_0, H \rangle. \end{aligned} \quad (2.10)$$

By setting  $W_0$  and  $F_0$  satisfying  $\langle W_0, H \rangle = \|P_{T^\perp} H\|_*$  and  $\langle F_0, H \rangle = -\|P_{\Omega^\perp} H\|_1$ , we have

$$\begin{aligned} & \langle SD^\top + W_0, H \rangle - \tau\langle \text{sgn}(Y_0) + F_0, H \rangle \\ & = \|P_{T^\perp} H\|_* + \tau\|P_{\Omega^\perp} H\|_1 + \langle SD^\top - \tau\text{sgn}(Y_0), H \rangle \\ & = \|P_{T^\perp} H\|_* + \tau\|P_{\Omega^\perp} H\|_1 + \langle \tau(F + P_\Omega K) - W, H \rangle \\ & \geq \frac{1}{2}(\|P_{T^\perp} H\|_* + \tau\|P_{\Omega^\perp} H\|_1) + \tau\langle P_\Omega K, H \rangle \end{aligned} \quad (2.11)$$

where the second equality holds from Eqn. (2.9), and the last inequality holds from

$$\langle \tau F - W, H \rangle \geq -|\langle W, H \rangle| - |\langle \tau F, H \rangle| \geq -(\|P_{T^\perp} H\|_* + \tau\|P_{\Omega^\perp} H\|_1)/2$$

for  $\|W\| \leq 1/2$  and  $\|F\|_\infty \leq 1/2$ . We further have

$$\langle \tau P_\Omega K, H \rangle \geq -\frac{\tau}{4}\|P_{\Omega^\perp} H\|_F - \frac{\tau}{2}\|P_{T^\perp} H\|_F \quad (2.12)$$

from  $\|P_\Omega K\|_F \leq 1/4$  and

$$\begin{aligned} \|P_\Omega H\|_F & \leq \|P_\Omega P_T H\|_F + \|P_\Omega P_{T^\perp} H\|_F \leq \|P_\Omega P_{T^\perp} H\|_F + \|H\|_F/2 \\ & \leq (\|P_\Omega H\|_F + \|P_{\Omega^\perp} H\|_F)/2 + \|P_\Omega P_{T^\perp} H\|_F. \end{aligned}$$

Combining with Eqns. (2.10) to (2.12), we have

$$\begin{aligned}
& \|X_0 + H\|_* + \tau\|Y_0 - H\|_1 - \alpha\langle M, Y_0 - H \rangle + \frac{\kappa}{2}\|Y_0 - H\|_F^2 \\
& \geq \|X_0\|_* + \tau\|Y_0\|_1 - \alpha\langle M, Y_0 \rangle + \frac{\kappa}{2}\|Y_0\|_F^2 \\
& \quad + \langle \alpha M - \kappa Y_0, H \rangle + \frac{1-\tau}{2}\|P_{T^\perp} H\|_* + \frac{\tau}{4}\|P_{\Omega^\perp} H\|_1
\end{aligned}$$

From the conditions that  $\Omega \cap T = \{0\}$ ,  $\tau = O(1/\sqrt{n})$ ,  $\kappa = O(1/\sqrt{n})$  and  $\alpha = O(1/n)$ , we have

$$\langle \alpha M - \kappa Y_0, H \rangle + \frac{1-\tau}{2}\|P_{T^\perp} H\|_* + \frac{\tau}{4}\|P_{\Omega^\perp} H\|_1 > 0 \quad (2.13)$$

for sufficient large  $n$ . Therefore, we can recover  $X_0$  and  $Y_0$  if there is a pair  $(W, F)$  satisfying Eqn. (2.9), and the pair  $(W, F)$  can be easily constructed according to [7]. We complete the proof from the condition  $\|Z\|_F \leq \delta$ .

Similarly to the proof of Theorem 2.1, we present the following theorem for the minimization problem of Eqn. (1.1).

**Theorem 2.2** *Suppose that  $X_0$  satisfies the incoherence condition given by Eqn. (2.5), and  $\Omega$  is uniformly distributed among all sets of size  $m \geq n^2/10$ . We assume that each entry is corrupted independently with probability  $q$ . Let  $X$  and  $Y$  be the solution of optimization problem given by Eqn. (1.1) with parameter  $\tau = O(1/\sqrt{n})$ ,  $\kappa = O(1/\sqrt{n})$  and  $\alpha = O(1/n)$ . For some constant  $c > 0$  and sufficiently large  $n$ , the following holds with probability at least  $1 - cn^{-10}$*

$$\|X_0 - X\|_F \leq \delta \text{ and } \|Y_0 - Y\|_F \leq \delta \quad (2.14)$$

if  $\text{rank}(X_0) \leq \rho_r n / \mu / \log^2 n$  and  $q \leq q_s$ , where  $\rho_r$  and  $q_s$  are positive constants.

### 3 Optimality condition

Before starting to show the convergence, we derive its optimality condition of (1.1). Let  $\mathcal{W} := \mathbf{B} \times \mathcal{R}^{m \times n} \times \mathcal{R}^{m \times n} \times \mathcal{R}^{m \times n}$ . It follows from Corollaries 28.2.2 and 28.3.1 of [1] that the solution set of (1.1) is non-empty. Then, let  $W^* = ((Z^*)^\top, (X^*)^\top, (Y^*)^\top, (\Lambda^*)^\top)^\top$  be a saddle point of (1.1). It is easy to see that (1.1) is equivalent to finding  $W^* \in \mathcal{W}$  such that

$$\begin{cases} \langle Z - Z^*, -\Lambda^* \rangle \geq 0, \\ \|X\|_* - \|X^*\|_* + \langle X - X^*, -\Lambda^* \rangle \geq 0, \\ \tau\|Y\|_1 - \tau\|Y^*\|_1 + \langle Y - Y^*, -\alpha\bar{M} + \kappa Y^* - \Lambda^* \rangle \geq 0, \\ X^* + Y^* + Z^* - \bar{M} = 0, \end{cases} \quad \forall W = \begin{pmatrix} Z \\ X \\ Y \\ \Lambda \end{pmatrix} \in \mathcal{W}, \quad (3.15)$$

or, in a more compact form:

$$\text{VI}(\mathcal{W}, \Psi, \theta) \quad \theta(U) - \theta(U^*) + \langle W - W^*, \Psi(W^*) \rangle \geq \frac{\kappa}{2}\|Y - Y^*\|_F^2, \quad \forall W \in \mathcal{W}, \quad (3.16a)$$

where

$$U = \begin{pmatrix} Z \\ X \\ Y \end{pmatrix}, \quad \theta(U) = \|X\|_* + \tau\|Y\|_1 - \alpha\langle \bar{M}, Y \rangle + \frac{\kappa}{2}\|Y\|_F^2, \quad (3.16b)$$

$$\text{and } W = \begin{pmatrix} Z \\ X \\ Y \\ \Lambda \end{pmatrix}, \quad V = \begin{pmatrix} X \\ Y \\ \Lambda \end{pmatrix}, \quad \Psi(W) = \begin{pmatrix} -\Lambda \\ -\Lambda \\ -\Lambda \\ X + Y + Z - \bar{M} \end{pmatrix}. \quad (3.16c)$$

Note that  $U$  collects all the primal variables in (3.15) and it is a sub-vector of  $W$ . Moreover, we use  $\mathcal{W}^*$  to denote the solution set of  $\text{VI}(\mathcal{W}, \Psi, \theta)$  and define  $V^* = ((X^*)^\top, (Y^*)^\top, (\Lambda^*)^\top)^\top$  and  $\mathcal{V}^* := \{V^* | W^* \in \mathcal{W}^*\}$ .

## 4 Convergence Analysis

In this section, we solve (1.1) with global convergence. More specifically, let  $(X^k, Y^k, \Lambda^k)$  be given, UMA generates the new iterate  $W^{k+1}$  via the following scheme:

$$\begin{cases} Z^{k+1} = \arg \min_{Z \in \mathbf{B}} \mathcal{L}_{\mathcal{A}}(X^k, Y^k, Z, \Lambda^k, \beta), \\ X^{k+1} = \arg \min_{X \in \mathcal{R}^{m \times n}} \mathcal{L}_{\mathcal{A}}(X, Y^k, Z^{k+1}, \Lambda^k, \beta), \\ Y^{k+1} = \arg \min_{Y \in \mathcal{R}^{m \times n}} \mathcal{L}_{\mathcal{A}}(X^{k+1}, Y, Z^{k+1}, \Lambda^k, \beta), \\ \Lambda^{k+1} = \Lambda^k - \beta(X^{k+1} + Y^{k+1} + Z^{k+1} - \bar{M}), \end{cases} \quad (4.1)$$

which can be easily written into the following more specific form:

$$Z^{k+1} = \arg \min_{Z \in \mathbf{B}} \frac{\beta}{2} \|Z + X^k + Y^k - \frac{1}{\beta} \Lambda^k - \bar{M}\|_F^2, \quad (4.2)$$

$$X^{k+1} = \arg \min_{X \in \mathcal{R}^{m \times n}} \|X\|_* + \frac{\beta}{2} \|X + Y^k + Z^{k+1} - \frac{1}{\beta} \Lambda^k - \bar{M}\|_F^2, \quad (4.3)$$

$$\begin{aligned} Y^{k+1} = \arg \min_{Y \in \mathcal{R}^{m \times n}} & \tau \|Y\|_1 - \alpha \langle \bar{M}, Y \rangle + \frac{\kappa}{2} \|Y\|_F^2 \\ & + \frac{\beta}{2} \|Y + X^{k+1} + Z^{k+1} - \frac{1}{\beta} \Lambda^k - \bar{M}\|_F^2, \end{aligned} \quad (4.4)$$

$$\Lambda^{k+1} = \Lambda^k - \beta(X^{k+1} + Y^{k+1} + Z^{k+1} - \bar{M}). \quad (4.5)$$

In the following, we concentrate on the convergence of UMA. In contrast to the existing results in [6], we aim to present a much more sharp result. We first prove some properties of the sequence generated by UMA, which play a crucial role in the coming convergence analysis. Before that, we introduce some notations:

$$\Delta_{\Lambda} := \frac{1}{2\beta} (\|\Lambda^{k+1} - \Lambda\|_F^2 - \|\Lambda^k - \Lambda\|_F^2 + \|\Lambda^{k+1} - \Lambda^k\|_F^2), \quad (4.6)$$

$$\Delta_X := \frac{1}{2\beta} (\|X^{k+1} - X\|_F^2 - \|X^k - X\|_F^2 + \|X^{k+1} - X^k\|_F^2), \quad (4.7)$$

$$\Delta_Y := \frac{1}{2\beta} (\|Y^{k+1} - Y\|_F^2 - \|Y^k - Y\|_F^2 + \|Y^{k+1} - Y^k\|_F^2), \quad (4.8)$$

$$\mathcal{R} = X + Y + Z - \bar{M}, \quad (4.9)$$

$$\mathcal{R}^{k+1} = X^{k+1} + Y^{k+1} + Z^{k+1} - \bar{M}. \quad (4.10)$$

**Lemma 4.1** *Let  $\{W^k\}$  be generated by UMA. Then, we have*

$$(1) \quad \langle \Lambda^k - \Lambda^{k+1}, Y^k - Y^{k+1} \rangle \geq \kappa \|Y^k - Y^{k+1}\|_F^2. \quad (4.11)$$

$$(2) \quad \langle \Lambda^k - \Lambda^{k+1}, X^k - X^{k+1} \rangle \geq \beta \langle X^k - X^{k+1}, Y^{k+1} - Y^k - (Y^k - Y^{k-1}) \rangle \quad (4.12)$$

*Proof:* (1) Using the optimality of (4.4), we get

$$\langle Y - Y^{k+1}, \partial(\tau \|Y^{k+1}\|_1) - \Lambda^{k+1} - \alpha \bar{M} + \kappa Y^{k+1} \rangle \geq 0. \quad (4.13)$$

Setting  $Y := Y^k$  in (4.13), we have

$$\langle Y^k - Y^{k+1}, \partial(\tau \|Y^{k+1}\|_1) - \Lambda^{k+1} - \alpha \bar{M} + \kappa Y^{k+1} \rangle \geq 0. \quad (4.14)$$

Then, setting  $Y := Y^{k+1}$  in (4.13) with the index  $k$  replaced with  $k-1$ , it yields

$$\langle Y^{k+1} - Y^k, \partial(\tau \|Y^k\|_1) - \Lambda^k - \alpha \bar{M} + \kappa Y^k \rangle \geq 0. \quad (4.15)$$

Thus, adding (4.14) and (4.15) together, the inequality (4.11) follows directly.

(2) The inequality (4.12) can be proved in a similar way as (4.11).

**Lemma 4.2** Let  $\{W^k\}$  be generated by UMA. Then, we have the following inequality:

$$\begin{aligned} & \theta(U) - \theta(U^{k+1}) + \langle W - W^{k+1}, \Psi(W^{k+1}) \rangle + \beta \langle \mathcal{R}, \Gamma(X^k, Y^k, Z^k) \rangle \\ & \geq \frac{1}{2} (\|V^{k+1} - V\|_Q^2 + \|V^k - V^{k+1}\|_Q^2 - \|V^k - V\|_Q^2) + \kappa \|Y^{k+1} - Y^k\|_F^2 \\ & \quad + \frac{\kappa}{2} \|Y^{k+1} - Y\|_F^2 - \beta \langle X^{k+1} - X^k, Y^{k+1} - Y^k - (Y^k - Y^{k-1}) \rangle \\ & \quad + \beta \langle Y^{k+1} - Y, X^{k+1} - X^k \rangle. \end{aligned} \quad (4.16)$$

where

$$\begin{aligned} \Gamma(X^k, Y^k, Z^k) &= Y^k - Y^{k+1} + X^k - X^{k+1}, \\ Q &= \begin{pmatrix} \beta I & 0 & 0 \\ 0 & \beta I & 0 \\ 0 & 0 & \frac{1}{\beta} I \end{pmatrix} \end{aligned} \quad (4.17)$$

*Proof:* According to the optimality condition of (4.1), we have

$$\begin{cases} \langle Z - Z^{k+1}, -\Lambda^{k+1} + \beta(X^k - X^{k+1}) + \beta(Y^k - Y^{k+1}) \rangle \geq 0, \\ \|X\|_* - \|X^{k+1}\|_* + \langle X - X^{k+1}, -\Lambda^{k+1} + \beta(Y^k - Y^{k+1}) \rangle \geq 0, \\ \tau \|Y\|_1 - \tau \|Y^{k+1}\|_1 + \langle Y - Y^{k+1}, -\alpha \bar{M} + \kappa Y^{k+1} - \Lambda^{k+1} \rangle \geq 0, \\ \langle \Lambda - \Lambda^{k+1}, X^{k+1} + Y^{k+1} + Z^{k+1} - \bar{M} - \frac{1}{\beta}(\Lambda^k - \Lambda^{k+1}) \rangle \geq 0, \end{cases} \quad \forall W = \begin{pmatrix} Z \\ X \\ Y \\ \Lambda \end{pmatrix} \quad (4.18)$$

Then, combining the above inequalities with (3.16b) and (3.16c), we get

$$\begin{aligned} & \theta(U) - \theta(U^{k+1}) + \langle W - W^{k+1}, \Psi(W^{k+1}) \rangle + \beta \langle (Z - Z^{k+1}, Y^k - Y^{k+1} + X^k - X^{k+1}) \\ & \quad + \beta \langle X - X^{k+1}, Y^k - Y^{k+1} \rangle \rangle \geq \frac{1}{2\beta} \Delta_\Lambda + \frac{\kappa}{2} \|Y - Y^{k+1}\|_F^2. \end{aligned}$$

Then, invoking (4.9) and (4.10), we obtain that

$$\begin{aligned} & \theta(U) - \theta(U^{k+1}) + \langle W - W^{k+1}, \Psi(W^{k+1}) \rangle + \beta \langle \mathcal{R} - \mathcal{R}^{k+1}, Y^k - Y^{k+1} + X^k - X^{k+1} \rangle \\ & \geq \frac{\kappa}{2} \|Y - Y^{k+1}\|_F^2 + \frac{1}{2\beta} \Delta_\Lambda + \frac{\beta}{2} (\Delta_X + \Delta_Y) + \beta \langle Y - Y^{k+1}, X^k - X^{k+1} \rangle. \end{aligned}$$

Thus, using  $\mathcal{R}^{k+1} = \frac{1}{\beta}(\Lambda^k - \Lambda^{k+1})$ , it yields that

$$\begin{aligned} & \theta(U) - \theta(U^{k+1}) + \langle W - W^{k+1}, \Psi(W^{k+1}) \rangle + \beta \langle \mathcal{R}, Y^k - Y^{k+1} + X^k - X^{k+1} \rangle \\ & \geq \frac{\kappa}{2} \|Y - Y^{k+1}\|_F^2 + \frac{1}{2\beta} \Delta_\Lambda + \frac{\beta}{2} (\Delta_X + \Delta_Y) + \beta \langle Y - Y^{k+1}, X^k - X^{k+1} \rangle \\ & \quad + \langle \Lambda^k - \Lambda^{k+1}, Y^k - Y^{k+1} + X^k - X^{k+1} \rangle. \end{aligned} \quad (4.19)$$

On the other hand, adding (4.11) and (4.12) together, we obtain that

$$\begin{aligned} & \langle \Lambda^k - \Lambda^{k+1}, Y^k - Y^{k+1} + X^k - X^{k+1} \rangle \\ & \geq \kappa \|Y^k - Y^{k+1}\|_F^2 - \beta \langle X^{k+1} - X^k, Y^{k+1} - Y^k - (Y^k - Y^{k-1}) \rangle. \end{aligned}$$

Next, substituting the above inequality into (4.19), and invoking, it yields the assertion (4.16).

□

In the following, we give each crossing term in the right-hand of (4.16) a low bound. The following inequalities enable us to get a much sharper result for UMA solving (1.1) in contrast to ([6]).

**Lemma 4.3** Let  $\{W^k\}$  be generated by UMA. Suppose that  $0 < \varepsilon < \sqrt{5} - 2$ . Then, it holds that

$$-\beta \langle X^{k+1} - X^k, Y^{k+1} - Y^k \rangle \geq \beta \left( -\frac{3 - \sqrt{5}}{4} \|X^k - X^{k+1}\|_F^2 - \frac{\|Y^{k+1} - Y^k\|_F^2}{3 - \sqrt{5}} \right), \quad (4.20)$$

$$\beta \langle X^{k+1} - X^k, (Y^k - Y^{k-1}) \rangle \geq \beta \left( -\frac{3 - \sqrt{5}}{4} \|X^k - X^{k+1}\|_F^2 - \frac{\|Y^k - Y^{k-1}\|_F^2}{3 - \sqrt{5}} \right), \quad (4.21)$$

$$\beta \langle Y^{k+1} - Y, X^{k+1} - X^k \rangle \geq -\beta \left( \frac{\|Y^{k+1} - Y\|_F^2}{2(\sqrt{5} - 2 - \varepsilon)} + \frac{\sqrt{5} - 2 - \varepsilon}{2} \|X^{k+1} - X^k\|_F^2 \right). \quad (4.22)$$

*Proof:* These three inequalities follow from Cauchy-Schwarz inequality.  $\square$

**Theorem 4.4** Let  $\{W^k\}$  be generated by UMA. Assume that  $\beta > 0$  in Algorithm (4.1). Suppose that  $0 < \varepsilon < \sqrt{5} - 2$ . Then, we have the following contractive property:

$$\begin{aligned}
& \frac{\beta}{2} \|X^{k+1} - X^*\|_F^2 + \frac{\beta}{2} \|Y^{k+1} - Y^*\|_F^2 + \frac{1}{2\beta} \|Z^{k+1} - Z^*\|_F^2 + \frac{\beta}{3 - \sqrt{5}} \|Y^k - Y^{k+1}\|_F^2 \\
& \leq \frac{\beta}{2} \|X^k - X^*\|_F^2 + \frac{\beta}{2} \|Y^k - Y^*\|_F^2 + \frac{1}{2\beta} \|Z^k - Z^*\|_F^2 + \frac{\beta}{3 - \sqrt{5}} \|Y^{k-1} - Y^k\|_F^2 \\
& \quad - \frac{\varepsilon}{2} \beta \|X^k - X^{k+1}\|_F^2 - (\kappa - \frac{\sqrt{5} + 2}{2} \beta) \|Y^{k+1} - Y^k\|_F^2 - \frac{1}{2\beta} \|\Lambda^k - \Lambda^{k+1}\|_F^2 \\
& \quad - (\kappa - \frac{1}{2(\sqrt{5} - 2 - \varepsilon)\beta}) \|Y^{k+1} - Y^*\|_F^2. \tag{4.23}
\end{aligned}$$

*Proof:* First, invoking (3.16a) and  $X^* + Y^* + Z^* - \bar{M} = 0$ , we have

$$\begin{aligned}
& \theta(U^{k+1}) - \theta(U^*) + \langle W^{k+1} - W^*, \Psi(W^{k+1}) \rangle + \beta \langle X^* + Y^* + Z^* - \bar{M}, \Gamma(X^k, Y^k, Z^k) \rangle \\
& \geq \frac{\kappa}{2} \|Y^{k+1} - Y^*\|_F^2. \tag{4.24}
\end{aligned}$$

Then, setting  $W := W^* \in \mathcal{W}^*$  in (4.16) and combining with (4.24), we obtain that

$$\begin{aligned}
0 & \geq \frac{\beta}{2} (\|V^{k+1} - V^*\|_Q^2 + \|V^k - V^{k+1}\|_Q^2 - \|V^k - V^*\|_Q^2) + \kappa \|Y^{k+1} - Y^k\|_F^2 + \kappa \|Y^{k+1} - Y^*\|_F^2 \\
& \quad - \beta \langle X^{k+1} - X^k, Y^{k+1} - Y^k - (Y^k - Y^{k-1}) \rangle + \beta \langle Y^{k+1} - Y, X^{k+1} - X^k \rangle. \tag{4.25}
\end{aligned}$$

Next, adding (4.20)-(4.22) together, then substituting the resulting inequality into (4.25), we derive the assertion (4.23) directly.  $\square$

Based on the above theorem, we have the following theorem immediately.

**Theorem 4.5** When  $\beta$  is restricted by

$$\beta \in \left(0, 2(\sqrt{5} - 2)\kappa\right), \tag{4.26}$$

there exists a sufficient small scalar  $\varepsilon > 0$  such that

$$\kappa - \frac{\sqrt{5} + 2}{2} \beta > 0, \text{ and } \kappa - \frac{1}{2(\sqrt{5} - 2 - \varepsilon)\beta} > 0. \tag{4.27}$$

Then, we have

- (1) The sequence  $\{V^k\}$  is bounded.
- (2)  $\lim_{k \rightarrow \infty} \{\|Y^k - Y^{k+1}\|_F^2 + \|X^k - X^{k+1}\|_F^2 + \|\Lambda^k - \Lambda^{k+1}\|_F^2\} = 0$ .

*Proof.* The inequality (4.27) is elementary. Note that the assertion (1) follows from (4.23) directly. Furthermore, we get

$$\begin{aligned}
& \sum_{k=1}^{\infty} \left[ \frac{\varepsilon}{2} \beta \|X^k - X^{k+1}\|_F^2 + (\kappa - \frac{\sqrt{5} + 2}{2} \beta) \|Y^{k+1} - Y^k\|_F^2 + \frac{1}{2\beta} \|\Lambda^k - \Lambda^{k+1}\|_F^2 \right] \\
& \leq \frac{\beta}{2} \|X^1 - X^*\|_F^2 + \frac{\beta}{2} \|Y^1 - Y^*\|_F^2 + \frac{1}{2\beta} \|Z^1 - Z^*\|_F^2 + \frac{\beta}{3 - \sqrt{5}} \|Y^0 - Y^1\|_F^2 < +\infty,
\end{aligned}$$

which immediately implies that

$$\lim_{k \rightarrow \infty} \|Y^k - Y^{k+1}\|_F = 0, \quad \lim_{k \rightarrow \infty} \|X^k - X^{k+1}\|_F = 0, \quad \lim_{k \rightarrow \infty} \|\Lambda^k - \Lambda^{k+1}\|_F = 0, \tag{4.28}$$

i.e., the second assertion.  $\square$

We are now ready to prove the convergence of UMA.

**Theorem 4.6** *Let  $\{V^k\}$  and  $\{W^k\}$  be the sequences generated by UMA. Assume that the penalty parameter  $\beta$  is satisfied with (4.26). Then, we have*

1. *Any cluster point of  $\{W^k\}$  is a solution point of (3.15).*
2. *The sequence  $\{V^k\}$  converges to some  $V^\infty \in \mathcal{V}^*$ .*
3. *The sequence  $\{U^k\}$  converges to a solution point of (1.1).*

*Proof:* Since  $\{W^k\}$  is bounded due to (4.23), it has at least one cluster point. Let  $W^\infty$  be a cluster point of  $\{W^k\}$  and the subsequence  $\{W^{k_j}\}$  converges to  $W^\infty$ . Because of the assertion (4.28), it follows from (4.18) that

$$\begin{cases} \langle Z - Z^\infty, -\Lambda^\infty \rangle \geq 0, \\ \|X\|_* - \|X^\infty\|_* + \langle X - X^\infty, -\Lambda^\infty \rangle \geq 0, \\ \tau\|Y\|_1 - \tau\|Y^\infty\|_1 + \langle Y - Y^\infty, -\alpha\bar{M} + \kappa Y^\infty - \Lambda^\infty \rangle \geq 0, \\ \langle \Lambda - \Lambda^\infty, X^\infty + Y^\infty + Z^\infty - \bar{M} \rangle \geq 0, \end{cases} \quad \forall W = \begin{pmatrix} Z \\ X \\ Y \\ \Lambda \end{pmatrix} \in \mathcal{W},$$

Thus,

$$\theta(U) - \theta(U^\infty) + (W - W^\infty)^\top \Psi(W^\infty) \geq \frac{\kappa}{2} \|Y - Y^\infty\|_F^2, \quad \forall W = (Z^\top, X^\top, Y^\top, \Lambda^\top)^\top \in \mathcal{W}.$$

This means that  $W^\infty$  is a solution of  $\text{VI}(\mathcal{W}, \Psi, \theta)$ . Then the inequality (4.23) is also valid if  $V^*$  is replaced by  $V^\infty$ . Therefore, the non-increasing sequence  $\{\frac{1}{2}\|V^k - V^\infty\|_Q^2 + \frac{\beta}{3-\sqrt{5}}\|Y^k - Y^{k+1}\|_F^2\}$  converges to 0 since it has a subsequence  $\{\frac{1}{2}\|V^{k_j} - V^\infty\|_Q^2 + \frac{\beta}{3-\sqrt{5}}\|Y^{k_j} - Y^{k_j+1}\|_F^2\}$  converges to 0. Thus, the sequence  $\{V^k\}$  converges to some  $V^\infty \in \mathcal{V}^*$ . Also, the updating scheme of  $\Lambda^{k+1}$  in (4.1) implies that

$$Z^{k+1} = \bar{M} - X^{k+1} - Y^{k+1} + \frac{1}{\beta}(\Lambda^k - \Lambda^{k+1}).$$

Combining the above equality, (4.28) and  $\lim_{k \rightarrow \infty} \|V^k - V^\infty\|_Q^2 = 0$ , we have  $W^k$  converges to  $W^\infty$ . It implies that the sequence  $U^k$  converges to a solution point of (1.1). Thus, the third assertion holds.

**Remark 4.7** *Note that the range for  $\beta$  in ([6]) with convergence guarantee is  $(0, 0.4\kappa)$  for UMA solving (1.1). However, we get a much larger range for the penalty parameter  $\beta$  in (4.26).*

Next, we present a worst-case  $O(1/t)$  convergence rate measured by the iteration complexity for UMA. Indeed, the range of  $\beta$  to ensure the  $O(1/t)$  convergence rate is slightly more restrictive than (4.26). Let us define

$$Z_t^{k+1} = \frac{1}{t} \sum_{k=1}^t Z^{k+1}, \quad X_t^{k+1} = \frac{1}{t} \sum_{k=1}^t X^{k+1}, \quad Y_t^{k+1} = \frac{1}{t} \sum_{k=1}^t Y^{k+1},$$

and

$$U_t^{k+1} = \frac{1}{t} \sum_{k=1}^t U^{k+1}, \quad W_t^{k+1} = \frac{1}{t} \sum_{k=1}^t W^{k+1}.$$

Obviously,  $W_t^{k+1} \in \mathcal{W}$  because of the convexity  $\mathcal{W}$ . By invoking Theorem 4.5, there exists a constant  $C$  such that

$$\max(\|X^k\|_F, \|Y^k\|_F, \|Z^k\|_F, \|\Lambda^k\|_F) \leq C, \quad \forall k.$$

Next, we present several lemmas to facilitate the convergence rate analysis.

**Lemma 4.8** Let  $\{W^k\}$  be generated by UMA. Suppose that  $0 < \varepsilon < \sqrt{33} - 5$ . Then, it holds that

$$-\beta \langle X^{k+1} - X^k, Y^{k+1} - Y^k \rangle \geq \beta \left( -\frac{7 - \sqrt{33}}{8} \|X^k - X^{k+1}\|_F^2 - \frac{7 + \sqrt{33}}{8} \|Y^{k+1} - Y^k\|_F^2 \right), \quad (4.29)$$

$$\beta \langle X^{k+1} - X^k, (Y^k - Y^{k-1}) \rangle \geq \beta \left( -\frac{7 - \sqrt{33}}{8} \|X^k - X^{k+1}\|_F^2 - \frac{7 + \sqrt{33}}{8} \|Y^k - Y^{k-1}\|_F^2 \right), \quad (4.30)$$

$$\beta \langle Y^{k+1} - Y, X^{k+1} - X^k \rangle \geq -\beta \left( \frac{\|Y^{k+1} - Y\|_F^2}{\sqrt{33} - 5 - \varepsilon} + \frac{\sqrt{33} - 5 - \varepsilon}{4} \|X^{k+1} - X^k\|_F^2 \right). \quad (4.31)$$

*Proof:* These three inequalities follow from Cauchy-Schwarz inequality.  $\square$

**Lemma 4.9** Let  $\{W^k\}$  be the sequence generated by UMA (4.1). If  $\beta$  is restricted by

$$\beta \in \left( 0, \frac{\sqrt{33} - 5}{2} \kappa \right), \quad (4.32)$$

then we have

$$\Theta(V^{k+1}, V^k, V) \leq \Theta(V^k, V^{k-1}, V) + \Xi(W^{k+1}, W^k, W), \quad (4.33)$$

where

$$\Theta(V^{k+1}, V^k, V) := \frac{1}{2} \|V^{k+1} - V\|_Q^2 + \frac{7 + \sqrt{33}}{8} \beta \|Y^{k+1} - Y^k\|_F^2. \quad (4.34)$$

and

$$\begin{aligned} \Xi(W^{k+1}, W^k, W) &:= \theta(U) - \theta(U^{k+1}) + (W - W^{k+1})^\top \Psi(W) \\ &\quad + \beta \langle \mathcal{R}, Y^k - Y^{k+1} + X^k - X^{k+1} \rangle. \end{aligned} \quad (4.35)$$

*Proof:* First, summing inequalities (4.29)-(4.31) together, we get

$$\begin{aligned} &\beta \langle X^{k+1} - X^k, Y^{k+1} - Y^k - (Y^k - Y^{k-1}) \rangle + \beta \langle Y^{k+1} - Y, X^{k+1} - X^k \rangle \\ &\geq \frac{\varepsilon - 2}{4} \beta \|X^{k+1} - X^k\|_F^2 - \frac{7 + \sqrt{33}}{8} \beta \|Y^{k+1} - Y^k\|_F^2 \\ &\quad - \frac{7 + \sqrt{33}}{8} \beta \|Y^k - Y^{k-1}\|_F^2 - \frac{1}{\sqrt{33} - 5 - \varepsilon} \beta \|Y^{k+1} - Y\|_F^2. \end{aligned}$$

Then, substituting the above inequality into (4.16) and invoking (4.34), (4.35), we obtain

$$\begin{aligned} \Theta(V^{k+1}, V^k, V) &\leq \Theta(V^k, V^{k-1}, V) + \Xi(W^{k+1}, W^k, W) - \|X^k\|_F^2 \\ &\quad - \left( \kappa - \frac{5 + \sqrt{33}}{4} \beta \right) \|Y^{k+1} - Y^k\|_F^2 - \frac{\beta}{4} \varepsilon \|X^{k+1} - X^k\|_F^2 - \frac{1}{2\beta} \|\Lambda^k - \Lambda^{k+1}\|_F^2 \\ &\quad - \left( \frac{\kappa}{2} - \frac{1}{\sqrt{33} - 5 - \varepsilon} \beta \right) \|Y^{k+1} - Y\|_F^2. \end{aligned}$$

Let  $\varepsilon \rightarrow 0+$ , the assertion follows directly.

**Theorem 4.10** For  $t$  iterations generated by UMA with  $\beta$  restricted in (4.32), the following assertions holds.

(1) We have

$$\begin{aligned} &\theta(U_t^{k+1}) - \theta(U) + (W_t^{k+1} - W)^\top \Psi(W) \\ &\leq \frac{1}{t} \left[ 4\beta C \|X + Y + Z - \bar{M}\|_F + \frac{1}{2} \|V^1 - V\|_Q^2 + \frac{7 + \sqrt{33}}{8} \beta \|Y^1 - Y^0\|_F^2 \right]. \end{aligned} \quad (4.36)$$

(2) There exists a constant  $\bar{c}_1 > 0$  such that

$$\|X_t^{k+1} + Y_t^{k+1} + Z_t^{k+1} - \bar{M}\|^2 \leq \frac{\bar{c}_1}{t^2}. \quad (4.37)$$

(3) There exists a constant  $\bar{c}_2 > 0$  such that

$$|\theta(U_t^{k+1}) - \theta(U^*)| \leq \frac{\bar{c}_2}{t}. \quad (4.38)$$

*Proof:* 1) First, it follows from the assertion (4.33) that for all  $W \in \mathcal{W}$ , we have

$$\begin{aligned} \theta(U) - \theta(U^{k+1}) + (W - W^{k+1})^\top \Psi(W) + \beta \langle \mathcal{R}, Y^k - Y^{k+1} + X^k - X^{k+1} \rangle \\ \geq \Theta(V^{k+1}, V^k, V) - \Theta(V^k, V^{k-1}, V). \end{aligned} \quad (4.39)$$

Summarizing both sides of the above inequalities from  $k = 1, 2, \dots, t$ , we have

$$\begin{aligned} t\theta(U) - \sum_{k=1}^t \theta(U^{k+1}) + (tW - \sum_{k=1}^t W^{k+1})^\top \Psi(W) + \beta \langle \mathcal{R}, Y^1 - Y^{t+1} + X^1 - X^{t+1} \rangle \\ \geq \Theta(V^{t+1}, V^t, V) - \Theta(V^1, V^0, V). \end{aligned} \quad (4.40)$$

Then, it follows from the convexity of  $\theta$  that

$$\theta(U_t^{k+1}) \leq \frac{1}{t} \sum_{k=1}^t \theta(U^{k+1}). \quad (4.41)$$

Combining (4.40) and (4.41), we have

$$\theta(U_t^{k+1}) - \theta(U) + (W_t^{k+1} - W)^\top \Psi(W) \leq \frac{1}{t} (\Theta(V^1, V^0, V) + 4\beta C \|\mathcal{R}\|_F). \quad (4.42)$$

Thus, the assertion (4.36) follows from the above inequality and the definition of  $\Theta(V^1, V^0, V)$  directly.

2) Let us define  $\bar{c}_1 = \frac{2}{\beta^2} (\|\Lambda^1 - \Lambda^*\|^2 + \|\Lambda^{k+1} - \Lambda^*\|^2)$ . Then, we have

$$\begin{aligned} \|X_t^{k+1} + Y_t^{k+1} + Z_t^{k+1} - \bar{M}\|^2 \\ = \left\| \frac{1}{t} \sum_{k=1}^t [X^{k+1} + Y^{k+1} + Z^{k+1} - \bar{M}] \right\|^2 \\ = \left\| \frac{1}{t} \sum_{k=1}^t \left[ \frac{1}{\beta} (\Lambda^k - \Lambda^{k+1}) \right] \right\|^2 = \left\| \frac{1}{t\beta} (\Lambda^1 - \Lambda^{t+1}) \right\|^2 \\ \leq \frac{2}{t^2 \beta^2} (\|\Lambda^1 - \Lambda^*\|^2 + \|\Lambda^{k+1} - \Lambda^*\|^2) = \frac{\bar{c}_1}{t^2}, \end{aligned}$$

The assertion (4.37) is proved immediately.

3) It follows from  $\mathcal{L}(U_t^{k+1}, \Lambda^*) \geq \mathcal{L}(U^*, \Lambda^*)$  with  $\mathcal{L}$  defined in (1.2) that

$$\begin{aligned} \theta(U_t^{k+1}) - \theta(U^*) &\geq \langle \Lambda^*, X_t^{k+1} + Y_t^{k+1} + Z_t^{k+1} - \bar{M} \rangle \\ &\geq -\frac{1}{2} \left( \frac{1}{t} \|\Lambda^*\|^2 + t \|X_t^{k+1} + Y_t^{k+1} + Z_t^{k+1} - \bar{M}\|^2 \right) \geq -\frac{1}{2t} (\|\Lambda^*\|^2 + \bar{c}_1), \end{aligned} \quad (4.43)$$

where the second inequality is due to Cauchy-Schwarz inequality, and the last is due to (4.37). On the other hand, setting  $W := W^*$  in (4.42), we obtain

$$\theta(U_t^{k+1}) - \theta(U^*) + \langle W_t^{k+1} - W^*, \Psi(W^*) \rangle \leq \frac{1}{t} \Theta(V^1, V^0, V^*).$$

Invoking the definition of  $\Psi$  in (3.16c), we have

$$(W_t^{k+1} - W^*)^\top \Psi(W^*) = -\langle \Lambda^*, X_t^{k+1} + Y_t^{k+1} + Z_t^{k+1} - \bar{M} \rangle \geq -\frac{1}{2t} (\|\Lambda^*\|^2 + \bar{c}_1),$$

where the proof of the last inequality is similar to (4.43). Combining these two inequalities above, we get

$$\theta(U_t^{k+1}) - \theta(U^*) \leq \frac{1}{t} \Theta(V^1, V^0, V^*) + \frac{1}{2t} (\|\Lambda^*\|^2 + \bar{c}_1). \quad (4.44)$$

The inequalities (4.43) and (4.44) indicate that the assertion (4.38) holds by setting  $\bar{c}_2 := \Theta(V^1, V^0, V^*) + \frac{1}{2} (\|\Lambda^*\|^2 + \bar{c}_1)$ .

## References

- [1] R. T. Rockafellar, *Convex Analysis*, Princeton University Press, Princeton, 2015.
- [2] M. Tao and X. M. Yuan, Recovering low-rank and sparse components of matrices from incomplete and noisy observations, *SIAM Journal on Optimization*, 21(1):57–81, 2011.
- [3] B. S. He, M. Tao, X. M. Yuan, A splitting method for separable convex programming, *IMA Journal of Numerical Analysis*, 35(1):394–426, 2015.
- [4] J. F. Cai, E. J. Candès, Z.W. Shen, A singular value thresholding algorithm for matrix completion, *SIAM Journal on Optimization*, 20(4):1956–1982, 2010.
- [5] J. Wright, A. Ganesh, S. Rao, and Y. Ma, Robust principal component analysis: Exact recovery of corrupted low-rank matrices via convex optimization. In *Proceedings of the 23rd Advances in neural information processing systems*, pages 2080–2088, 2009.
- [6] M. Tao and X. M. Yuan, Convergence analysis of the direct extension of ADMM of multiple-block separable convex minimization, *Advances in Computational Mathematics*, 44(3):773–813, 2018.
- [7] E. J. Candès and X. D. Li and Y. Ma and J. Wright, Robust principal component analysis?, *Journal of the ACM*, 58(3):1–37, 2011.
